# Supplementary material for: Prognostic Significance of CIP2A in Esophagogastric Junction Adenocarcinoma: A Study of 65 Patients and a Meta-Analysis
Source: PubMed Central journal article supplement (PMC6724434; doi:10.1155/2019/2312439), 2019-08-22

**Supplementary Material 2. Begg's funnel plots for the studies involved in the meta-analysis of CIP2A expression and the prognosis of patients with solid tumors. a. Overall survival. b. Time to tumor progression.** Abbreviations: loghr, logarithm of hazard ratios; s.e., standard error.

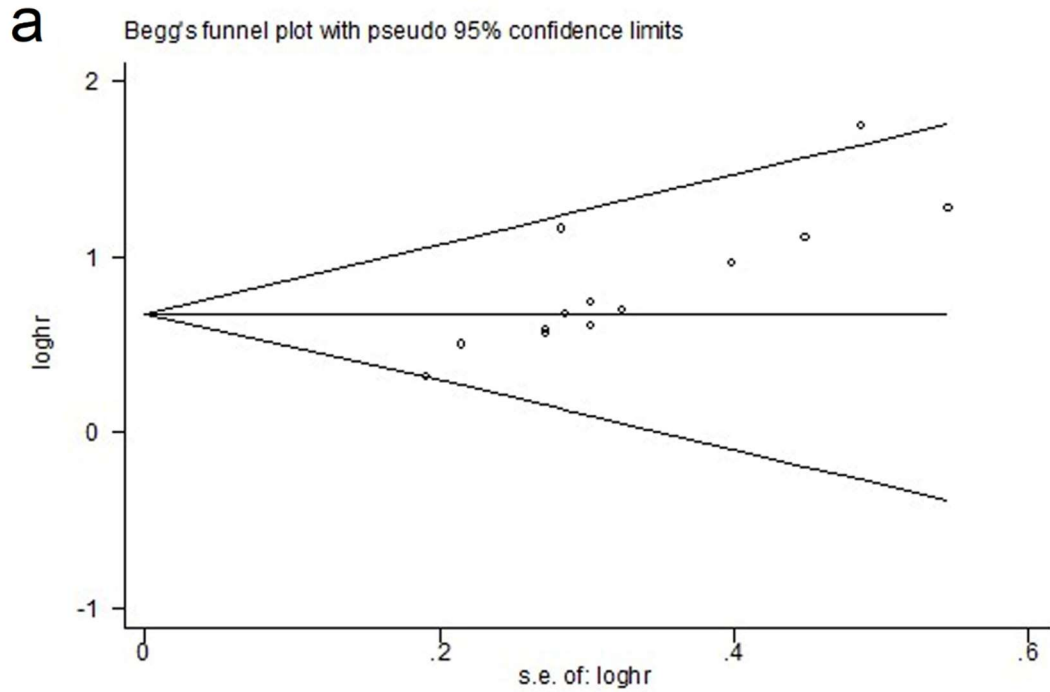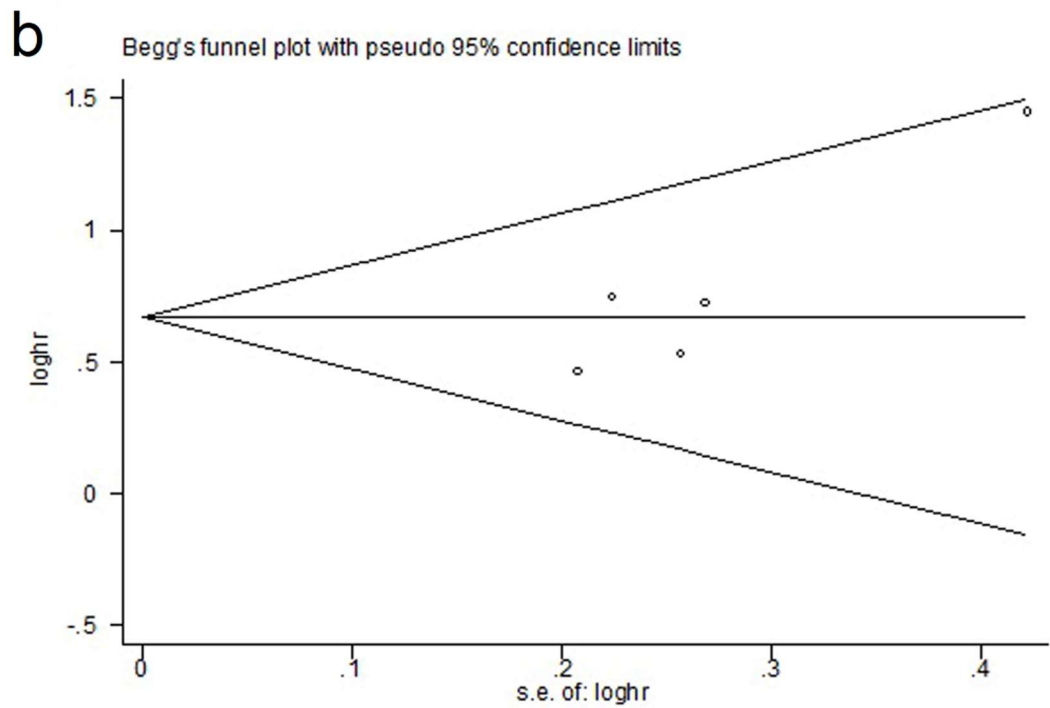

Supplement: 2312439.f2.pdf [file 2312439.f2.pdf]
