# Supplementary material for: Prognostic Significance of CIP2A in Esophagogastric Junction Adenocarcinoma: A Study of 65 Patients and a Meta-Analysis
Source: Hindawi journal article supplement (doi:10.1155/2019/2312439), 2019-08-22
Supplement: f1 [file 2312439.f1.pdf]

**Supplementary Material 1. Associations of clinicopathologic parameters and CIP2A expression with prognosis**

| Variable         | No. of Patients (%) |          | <i>P</i> <sup>a</sup> |
|------------------|---------------------|----------|-----------------------|
|                  | Survival            | Death    |                       |
| Total case       | 28(43.1)            | 37(56.9) |                       |
| Age(y)           |                     |          | 0.015*                |
|                  | ≤65                 | 15(23.1) |                       |
|                  | >65                 | 13(20.0) |                       |
| Gender           |                     |          | 0.377                 |
|                  | Male                | 23(35.4) |                       |
|                  | Female              | 5(7.7)   |                       |
| Grade            |                     |          | 0.028*                |
|                  | Low (I-II)          | 21(32.3) |                       |
|                  | High (III-IV)       | 7(10.8)  |                       |
| TNM Stage        |                     |          | 0.018*                |
|                  | Early (I-II)        | 13(20.0) |                       |
|                  | Late (III-IV)       | 15(23.1) |                       |
| Lymph Metastasis |                     |          | 0.018*                |
|                  | No                  | 13(20.0) |                       |
|                  | Yes                 | 15(23.1) |                       |
| Metastasis       |                     |          | 0.320                 |
|                  | No                  | 28(43.1) |                       |
|                  | Yes                 | 0(0.0)   |                       |
| CIP2A Expression |                     |          | 0.030*                |
|                  | Low                 | 14(21.5) |                       |
|                  | High                | 14(21.5) |                       |

<sup>a</sup> Fisher Exact test

\* *P* < 0.05
